# Supplementary material
Source: Research Square preprint supplement (doi:10.21203/rs.3.rs-9696531/v1)
Supplement: Supplementary file 1 [file 9256fb3c3d123e3cf2de4dfb.pdf]

# 1 **Supplementary Material**

2

## 3 **Paleogeographic uncertainty imposes first-order constraint on un-** 4 **derstanding Earth's climate evolution**

5 Werner et al. (2026)

6

## 7 **Supplementary Information**

### 8 **Differences between Paleogeographic reconstructions**

9 PALEOMAP is the most interpretive of the three. It reconstructs past environments from geolog-  
10 ical proxies and maps them to broad elevation classes, with low-lying settings assigned modest  
11 elevations and collisional belts assigned high elevations; its bathymetry is a mere fixed depth at  
12 4000 m for most of the Phanerozoic (Scotese, 2021)

13 MERDITH is a full-plate reconstruction with explicit plate boundaries and kinematic consistency  
14 through time. Its topography is generated dynamically from tectonic environments such as arcs,  
15 collisions, rifts, and large igneous provinces, while its bathymetry is calculated separately from  
16 synthetic oceanic crustal age grids using a plate-cooling age-depth model, then merged with the  
17 topography (Merdith et al., 2025, preprint)

18 PANALEISIS is also a full-plate model covering 100% of Earth's surface, and it uses a dual-control  
19 framework. In that framework, each reconstruction is constrained both by present-day geological  
20 evidence moved back to its past position and by dynamic coherence with the preceding

21 reconstruction, which then controls the next one. Its topography is generated from plate-model  
22 features through TopoChronia (Franziskakis et al., 2025) by converting geological setting pol-  
23 ylines into points with assigned elevation values, while ocean depths are derived from mid-ocean  
24 ridges and isochrons using plate-cooling equations, with sediment loading and water-load subsid-  
25 ence corrections applied separately.

26 In short, PALEOMAP is the most semi-quantitative, MERDITH is the most process-explicit, and  
27 PANALEISIS combines explicit plate-tectonic control with a dual-control reconstruction workflow  
28 for deriving synthetic topography and bathymetry.

## 29 **Supplementary Methods**

### 30 **GMST calculation and uncertainty bounds**

31 Global mean surface temperature (GMST) for each time-slice was derived from the model's  
32 near-surface air-temperature field by first converting the raw monthly output to an annual mean  
33 and then applying a cosine-latitude weighting to account for the spherical geometry of the Earth  
34 (the weight at each latitude =  $\cos \phi$ , normalized by the total number of longitudes) before summing  
35 over all latitude–longitude cells. This latitude-weighted average was performed for each simula-  
36 tion, and the resulting GMST values (in kelvin) were subsequently converted to degrees Celsius  
37 ( $^{\circ}\text{C}$ ) by subtracting 273.15 K. Because the four hierarchical experiments (continents-only, +topog-  
38 raphy, +bathymetry, full) each provide an independent estimate of GMST for the same paleogeo-  
39 graphic slice, the spread among them was taken as a measure of structural uncertainty due to paleo-  
40 geographic complexity. To quantify statistical confidence, a bootstrap-resampling procedure was  
41 applied across the four experiment tiers: for each of 400 replicates the GMST values at a given

42 age were randomly drawn with replacement from the available tiers, the mean was recomputed,  
43 and a moving-average pre-filter was applied before interpolating the bootstrap series onto a uni-  
44 form 1 Ma age grid using a piecewise-cubic Hermite interpolant. The 16-th/84-th and  
45 2.5-th/97.5-th percentiles of the 400 bootstrap realizations defined the central 68 % and 95 % un-  
46 certainty envelopes that are shown as shaded bands around the smoothed GMST curves. Finally,  
47 the inter-reconstruction GMST spread at each age was calculated as the difference between the  
48 maximum and minimum GMST across the three paleogeographic families on the common age  
49 grid, providing a regime-by-regime metric of paleogeographic-driven temperature variability.

## 50 **Statistical Analysis**

51 For regime-based statistical analyses, we first computed the reconstruction-induced GMST spread  
52  $\Delta\text{GMST}(t)$  at each age  $t$  on the common 1 Ma grid as the difference between the maximum and  
53 minimum smoothed GMST across the three paleogeographic reconstructions (PANALESIS,  
54 MERDITH, PALEOMAP). Ages were then assigned to tectonic regimes using fixed age bounda-  
55 ries (Pre-Pangea: 320–545 Ma; Pangea: 200–320 Ma; Post-Pangea: 0–200 Ma), and ages falling  
56 outside these bounds were excluded from regime statistics. Within each regime, we summarized  
57 the distribution of  $\Delta\text{GMST}$  using the sample size  $n$ , mean, median, standard deviation, interquartile  
58 range (25th–75th percentiles), and full range (minimum–maximum). To test for differences in  
59  $\Delta\text{GMST}$  among regimes, we used a Kruskal–Wallis test (non-parametric ANOVA) across the three  
60 regimes, reporting the Kruskal–Wallis statistic ( $H$ ), two-sided ( $p$ )-value, and the associated epsi-  
61 lon-squared effect size  $\varepsilon^2$ , computed as  $\varepsilon^2 = (H - k + 1)/(n - k)$ , where  $k$  is the number of regimes  
62 and  $n$  the total number of slices included in the test. Pairwise regime differences were assessed  
63 with two-sided Mann–Whitney U tests, for each pair of regimes, and we quantified the effect size

64 using the rank-biserial correlation,  $r_{rb} = 1 - 2U/(n_1 n_2)$ ), where  $U$  is the Mann–Whitney statistic  
65 and  $n_1, n_2$ ) the sample sizes in each regime; to control the false discovery rate across pairwise  
66 comparisons, we applied the Benjamini–Hochberg procedure to the set of pairwise  $p$ -values and  
67 report both raw and FDR-adjusted  $p$ -values. Because adjacent ages on the 1 Ma grid are not strictly  
68 independent, we evaluated the robustness of our conclusions to temporal autocorrelation by “thin-  
69 ning” the series (retaining every 1, 5, 10, or 20 Ma point), recomputing the Kruskal–Wallis test  
70 and  $\epsilon^2$  for each thinning step, and confirming that the inferred regime differences and effect sizes  
71 are qualitatively unchanged. In addition, we characterized the stability of the reconstruction rank-  
72 ing through time by computing, at each age, which reconstruction is warmest and coldest, the  
73 fraction of ages with the strict ordering MERDITH > PALEOMAP > PANALEISIS, and Kendall’s  
74 coefficient of concordance  $W$  across reconstructions: we first ranked GMST values within each  
75 age (1 = coldest, 3 = warmest), then calculated  $W$  from the summed ranks per reconstruction and  
76 assessed its significance using a chi-square approximation with  $\chi^2 = n(k-1)W$  and  $k-1$  degrees of  
77 freedom.

#### 78 Regime $\Delta$ GMST diagnostics

79 Pre-Pangea:  $n=221$ , mean= $5.61$  °C, median= $5.15$  °C, IQR= $4.72$ – $6.11$  °C, range= $4.26$ – $8.49$  °C

80 Pangea:  $n=120$ , mean= $4.30$  °C, median= $4.63$  °C, IQR= $3.01$ – $5.58$  °C, range= $1.68$ – $6.40$  °C

81 Post-Pangea:  $n=200$ , mean= $4.37$  °C, median= $4.34$  °C, IQR= $2.92$ – $5.99$  °C, range= $0.76$ – $7.39$  °C

82 Kruskal–Wallis across regimes:  $H=63.879$ ,  $p=1.35e-14$ ,  $\epsilon^2=0.115$  ( $k=3$ ,  $n=541$ )

83 Pairwise Mann–Whitney  $U$  (two-sided), BH-FDR corrected; effect size = rank-biserial:

84 *Pre-Pangea vs Pangea:*

85  $U=18684.0$ ,  $p=4.42e-10$ ,  $p_{BH}=6.63e-10$ ,  $RBC=-0.409$  ( $n_A=221$ ,  $n_B=120$ )

86

87 *Pre-Pangea vs Post-Pangea:*

88  $U=30945.0$ ,  $p=1.3e-12$ ,  $p_{BH}=3.91e-12$ ,  $RBC=-0.400$  ( $nA=221$ ,  $nB=200$ )

89

90 *Pangea vs Post-Pangea:*

91  $U=11572.0$ ,  $p=0.594$ ,  $p_{BH}=0.594$ ,  $RBC=0.036$  ( $nA=120$ ,  $nB=200$ )

92

93 Sensitivity to thinning (addresses autocorrelation by reducing effective n):

94

| <b>thin_step_Ma</b> | <b>n</b> | <b>H</b> | <b>p</b>  | <b><math>\epsilon^2</math></b> |
|---------------------|----------|----------|-----------|--------------------------------|
| 1                   | 541      | 63.88    | 1.345e-14 | 0.115                          |
| 5                   | 109      | 12.77    | 0.001689  | 0.1016                         |
| 10                  | 55       | 6.908    | 0.03161   | 0.09439                        |
| 20                  | 28       | 3.469    | 0.1765    | 0.05876                        |

95

96

## 97 **Geoinicators**

98 To relate large-scale climate responses to the underlying paleogeography, we compute a set of

99 quantitative geoinicators for each reconstruction and time slice. These metrics and calculations

100 are based on the geo\_indicators repository [https://github.com/florianfranz/geo\\_indicators](https://github.com/florianfranz/geo_indicators).

101 These metrics summarize land–sea configuration, continental distribution by latitude, shelf ex-

102 tent, topographic relief, and ocean-gateway geometry on the same grid used by the climate

103 model.

104 All geoindicators are derived from the gridded land–sea mask, surface elevation, and ocean ba-  
105 thymetry fields for PALEOMAP, PANALEISIS, and MERDITH, using consistent geometric def-  
106 initions across reconstructions and through time. The resulting scalar predictors are then used in  
107 the statistical dependency analysis linking paleogeography to GMST, land-mean (P-E), and  
108 equatorial ocean heat transport.

109 We group the geoindicators into the following categories.

110 *Global land–sea metrics*

- 111 • Total land area ( $\text{m}^2$ ) and total ocean area ( $\text{m}^2$ ) computed from the land–sea mask.
- 112 • Ocean volume ( $\text{m}^3$ ), obtained by integrating bathymetric depth over all ocean grid cells.
- 113 • Land fraction and ocean fraction, expressed as the global area fractions of land and ocean  
114 and used in some analyses as “total land area” or “total land fraction”.

115 *Latitudinal land-distribution metrics*

116 To capture where continents reside relative to the circulation and insolation field, we compute  
117 land area within fixed latitude bands:

- 118 • Tropical land area ( $\text{m}^2$ ) and subtropical land area ( $\text{m}^2$ ).
- 119 • Temperate land area ( $\text{m}^2$ ).
- 120 • Polar land area ( $\text{m}^2$ ) and polar land percentage, defined as the land fraction within the po-  
121 lar latitude bands.
- 122 • Northern-hemisphere land area and southern-hemisphere land area ( $\text{m}^2$ ), characterizing  
123 hemispheric asymmetry in continental distribution.

124 These latitudinal metrics appear in the importance analysis as “tropical”, “subtropical”, “temper-  
125 ate”, “polar”, “northern-hemisphere”, and “southern-hemisphere” land area, and they consist-  
126 ently rank among the most influential predictors for GMST and land (P-E).

### 127 *Shelf and coastline metrics*

128 Continental margins and shelf seas exert a strong control on ocean circulation and air–sea ex-  
129 change. We therefore diagnose:

- 130 • Continental shelf area ( $\text{m}^2$ ), defined as the area of ocean grid cells within a prescribed  
131 shallow-water depth range, and its normalized variant shelf fraction.
- 132 • Coastline length (m), computed as the total length of land–sea boundaries on the model  
133 grid.

134 Shelf fraction and coastline length are used both directly as predictors and indirectly in compo-  
135 site metrics such as shelf fraction and land asymmetry in the mutual-information analysis with  
136 GMST.

### 137 *Topographic metrics*

138 To represent the climatic influence of orography and elevated plateaus, we use:

- 139 • High-elevation land area ( $\text{m}^2$ ), the area of land grid cells above a prescribed elevation  
140 threshold, and a more generic high-altitude area ( $\text{m}^2$ )
- 141 • Total land area ( $\text{m}^2$ ) (as in section 1), which combines with high-elevation area to encode  
142 the relative extent of mountainous versus low-lying terrain.

143 High-elevation land area emerges as an important, though reconstruction-contingent, control par-  
144 ticularly for circulation-sensitive metrics such as equatorial ocean heat transport.

145 *Connectivity and gateway metrics*

146 Ocean-gateway geometry influences basin connectivity and meridional heat transport. We quan-  
147 tify this using:

- 148 • Minimum ocean-gateway width (km): the narrowest effective connection between major  
149 ocean basins, regardless of orientation.
- 150 • Minimum east–west (E–W) gateway width (km): the minimum zonal width of any  
151 low-latitude ocean passage, a proxy for the potential strength and structure of zonal cur-  
152 rents.
- 153 • Passage minimum width (km): a more general metric capturing the smallest width of any  
154 continuous navigable ocean corridor.

155 These gateway metrics appear in the importance heatmaps as “minimum ocean-gateway width”  
156 and “minimum E–W gateway width” and show particularly high, and reconstruction-dependent,  
157 importance for equatorial ocean heat transport.

158 *Tectonic aggregation metrics*

159 Finally, we include simple measures of continental aggregation:

- 160 • Number of continents, defined as the number of distinct land clusters separated by ocean  
161 at the model resolution.

- 162 • Derived measures such as land asymmetry, constructed from the difference between  
163 northern- and southern-hemisphere land area, and used in some sensitivity analyses of  
164 GMST.

165 All geoindicators are computed independently for each reconstruction family and time slice and  
166 compiled into predictor tables that are archived alongside the analysis scripts. These tables form  
167 the input to the cross-validated statistical models that quantify the predictability of GMST, land  
168 (P-E), and equatorial ocean heat transport from paleogeography and underpin the importance  
169 analyses shown in Fig. S6.

170

### 171 **Predictability of GMST from geography**

172 Predictability of large-scale climate metrics—GMST, land-mean P–E, and  $OHT_{eq}$ —was quantified using  
173 cross-validated statistical dependency models relating climate responses to a suite of quantitative paleoge-  
174 ographic indicators. These indicators describe continental distribution by latitude, coastline geometry, con-  
175 tinental shelf extent, land elevation, ocean basin geometry, and gateway width.

176 Model skill was evaluated using out-of-sample  $R^2$ , computed separately for each paleogeographic recon-  
177 struction and for a pooled dataset combining all reconstructions. This comparison distinguishes reconstruc-  
178 tion-specific predictability from signals that are robust across alternative geographic realizations.

179 Predictor importance was assessed using permutation-based importance scores, defined as the reduction in  
180 cross-validated  $R^2$  from random permutation of each predictor. Importance scores were computed inde-  
181 pendently for each reconstruction to allow direct assessment of reconstruction contingency.

182 To identify robust versus reconstruction-contingent geographic controls, we analyzed (i) the mean permu-  
 183 tation importance of each predictor across reconstructions and (ii) the coefficient of variation (CV = stand-  
 184 ard deviation / mean) of importance across reconstructions. Pairwise Spearman rank correlations between  
 185 reconstruction-specific importance vectors were used to quantify agreement in inferred controls. Only pre-  
 186 dictors with positive median importance were retained to avoid spurious contributions from noise-domi-  
 187 nated variables.

188

### 189 3. Supplementary Tables

#### 190 PlaSim-GENIE parameterization

191 **Supplementary Table 1: PlaSim-GENIE configuration and parameter values used in the paleogeographic**  
 192 **ensemble experiments.** The table lists XML parameter names, numerical values, and brief functional descrip-  
 193 tions for (i) CONTROL settings that define integration length, time stepping, and coupling frequencies; (ii) the  
 194 GOLDSTEIN ocean module, including diffusivities, drag, equation-of-state and mixing parameters; (iii) the  
 195 GOLDSTEINSEAICE module, including sea-ice diffusivity and thickness/area thresholds; and (iv) the PLASIM  
 196 atmosphere-land component, including radiation coefficients, dissipation and diffusion parameters, CO<sub>2</sub> con-  
 197 centration, solar constant, and surface albedo settings. These values define the common baseline model config-  
 198 uration applied to all simulations reported in this study.

| SECTION | PARAMETER      | VALUE (AS IN XML) | PURPOSE / DESCRIPTION                                              |
|---------|----------------|-------------------|--------------------------------------------------------------------|
| CONTROL | koverall_total | 34 560 000        | Total number of atmospheric timesteps (defines simulation length). |

|                                    |            |                                                                           |
|------------------------------------|------------|---------------------------------------------------------------------------|
| genie_timestep                     | 2739.375 s | Length of one atmospheric timestep (derived from a 365.25 day year).      |
| par_data_save_slice_n              | 180        | Number of timesteps per output sub-interval (monthly-like saving).        |
| kocn_loop                          | 16         | Gear ratio: atmosphere timesteps per ocean timestep (45 min × 16 = 12 h). |
| ksic_loop                          | 16         | Gear ratio for sea-ice timesteps (same 12 h coupling).                    |
| conv_kocn_katchem                  | 10         | Coupling interval for ocean ↔ atmospheric chemistry.                      |
| conv_kocn_kbiogem                  | 10         | Coupling interval for ocean ↔ biogeochemistry.                            |
| conv_kocn_krokgem                  | 10         | Coupling interval for ocean ↔ rock-weathering.                            |
| conv_kocn_ksedgem                  | 180        | Coupling interval for ocean ↔ sediment module.                            |
| par_grid_lon_offset                | -2.8125    | Longitudinal offset for the GENIE grid.                                   |
| atm_select (indices 3,4,5,6,18,19) | .true.     | Activate specific atmospheric diagnostics/components.                     |

|                          |                                                         |          |                                                                                        |
|--------------------------|---------------------------------------------------------|----------|----------------------------------------------------------------------------------------|
|                          | ocn_select (indices<br>3,4,5,8,10,12,15,16,17,20,45,46) | .true.   | Activate chosen oceanic processes/modules.                                             |
|                          | sed_select (indices<br>3,4,5,8,14,15,16,22,32,33,34,36) | .true.   | Enable selected sediment-transport tracers.                                            |
| <b>GOLDSTEIN (OCEAN)</b> | debug_loop                                              | .true.   | Turn on diagnostic output for debugging.                                               |
|                          | saln0                                                   | 34.9 psu | Reference salinity for the ocean.                                                      |
|                          | igrd                                                    | 2        | Flag for T21 latitude spacing.                                                         |
|                          | yearlen                                                 | 360      | Length of a model year in days (360-day calendar).                                     |
|                          | nyear                                                   | 720      | Number of ocean timesteps per model year (12-h step).                                  |
|                          | iwstp                                                   | 72 000   | Restart output frequency (every 100 yr).                                               |
|                          | ianav                                                   | 72 000   | 3-D field output frequency (every 10 yr).                                              |
|                          | itstp                                                   | 72 000   | Integral diagnostics output frequency (every 1 yr).                                    |
|                          | npstp                                                   | 72 000   | Screen diagnostics output frequency (every 1 yr).                                      |
|                          | world                                                   | 0155pmCO | Identifier for the set of boundary-condition files (land-sea mask, bathymetry, paths). |

|                        |               |                                            |                                                                                 |
|------------------------|---------------|--------------------------------------------|---------------------------------------------------------------------------------|
|                        | tdatafile     | pl16_tempann.silo                          | Observational ocean temperature climatology file.                               |
|                        | sdatafile     | pl16_saliann.silo                          | Observational ocean salinity climatology file.                                  |
|                        | temp1 / temp0 | 0.0 °C                                     | Initial ocean temperature for NH/SH (0 °C indicates use of observational init). |
|                        | diff(1)       | 2005.240135 m <sup>2</sup> s <sup>-1</sup> | Isopycnal (horizontal) diffusivity – tuned parameter OHD.                       |
|                        | diff(2)       | 0.000135386 m <sup>2</sup> s <sup>-1</sup> | Diapycnal (vertical) diffusivity – tuned parameter OVD.                         |
|                        | adrag         | 2.554625913 days                           | Inverse frictional drag coefficient – tuned.                                    |
|                        | scf           | 2.44653955                                 | Wind-stress scaling factor – tuned.                                             |
|                        | ediffpow1     | 1.077402066                                | Depth-dependence exponent for diapycnal diffusivity – tuned.                    |
|                        | ieos          | 1                                          | Enable thermobaricity in the equation of state (1 = on).                        |
|                        | iediff        | 1                                          | Enable stratification-dependent mixing (1 = on).                                |
| <b>GOLDSTEINSEAICE</b> | debug_loop    | .true.                                     | Debug output for sea-ice module.                                                |
|                        | igrd          | 2                                          | Same T21 grid flag as ocean.                                                    |

|                                 |                               |                                      |                                                                                               |
|---------------------------------|-------------------------------|--------------------------------------|-----------------------------------------------------------------------------------------------|
|                                 | nyear                         | 720                                  | Sea-ice timestep frequency (12 h).                                                            |
|                                 | iwstp / ianav / npstp / itstp | 72 000                               | Output frequencies matching ocean module.                                                     |
|                                 | world                         | 0155pmCO                             | Same boundary-condition label as ocean.                                                       |
|                                 | diffsic                       | 15000 m <sup>2</sup> s <sup>-1</sup> | Sea-ice diffusivity (non-default SID).                                                        |
|                                 | par_sich_thresh               | 30.0 m                               | Maximum sea-ice thickness allowed for advection into a cell (prevents non-convergent growth). |
|                                 | par_sica_thresh               | 1.0 %                                | Fractional sea-ice cover threshold that stops further sea-ice addition by advection.          |
| <b>PLASIM (ATMOSPHERE-LAND)</b> | ngear                         | 1                                    | Gear ratio for atmospheric internal loops (no sub-stepping).                                  |
|                                 | ngear_years_plasim            | 1                                    | Years per gear cycle (baseline).                                                              |
|                                 | ngear_multiple                | 10                                   | Multiplier for diagnostic output frequency.                                                   |
|                                 | nafter                        | 1 152 000                            | Number of atmospheric timesteps between averaged output ( $\approx 10$ yr).                   |
|                                 | albgmax                       | 0.8                                  | Maximum surface albedo (e.g., for snow/ice).                                                  |

|            |             |                                                                         |
|------------|-------------|-------------------------------------------------------------------------|
| qthresh    | 0.1         | Moisture-content threshold for photosynthesis (disabled in this study). |
| scale_apm  | 0           | Scaling factor for Atlantic-Pacific moisture flux adjustment (tuned).   |
| co2        | 1120 ppm    | Atmospheric CO <sub>2</sub> concentration (fixed for all runs).         |
| albseamax  | 0.449923169 | Latitude-dependent ocean albedo parameter.                              |
| gsol0      | 1365        | Incoming solar radiation                                                |
| tdissd     | 0.012448584 | Dissipation coefficient for zonal wind component.                       |
| tdissz     | 0.046267461 | Dissipation coefficient for meridional wind component.                  |
| tdisst     | 1.03201731  | Dissipation coefficient for temperature tendency.                       |
| tdissq     | 0.061880547 | Dissipation coefficient for specific humidity tendency.                 |
| vdiff_lamm | 12.95755067 | Vertical diffusion coefficient for momentum.                            |
| tswr1      | 0.324030081 | Short-wave radiation scaling factor (band 1).                           |
| tswr2      | 0.032974609 | Short-wave radiation scaling factor (band 2).                           |

|                            |                                 |                          |                                                                    |
|----------------------------|---------------------------------|--------------------------|--------------------------------------------------------------------|
|                            | acllwr                          | 0.501520425              | Long-wave radiation scaling factor.                                |
|                            | th2oc                           | 0.023572382              | Temperature-to-ocean coupling coefficient.                         |
|                            | rcritmin                        | 0.948665442              | Minimum critical relative humidity for cloud formation.            |
|                            | gamma                           | 0.007991045              | Convective adjustment strength parameter.                          |
|                            | k17                             | 0.842488946              | Tuned coefficient for cloud-radiative feedback.                    |
|                            | k18                             | $1.204 \times 10^{-7}$   | Tuned coefficient for cloud optical depth.                         |
|                            | k26                             | $2.41966 \times 10^{-9}$ | Small-scale turbulence parameter.                                  |
|                            | k32                             | 218.3556628              | Surface drag coefficient.                                          |
| <b>BUILD / COMPILATION</b> | IGCMATMOSDP / GENIEDP           | TRUE                     | Enable double-precision arithmetic for atmosphere and GENIE cores. |
|                            | GENIENX / GENIENY               | 64 / 32                  | Atmospheric horizontal resolution ( $64 \times 32$ grid).          |
|                            | GOLDSTEINMAXISLES               | 15                       | Maximum number of islands allowed in the sea-ice/ ocean mask.      |
|                            | GOLDSTEINNLONS / GOLDSTEINNLATS | 64 / 32                  | Ocean horizontal resolution ( $64 \times 32$ ).                    |
|                            | GOLDSTEINNLEVS                  | 16                       | Number of vertical ocean levels.                                   |

|  |                              |         |                                          |
|--|------------------------------|---------|------------------------------------------|
|  | SEDGEMNLONS /<br>SEDGEMNLATS | 64 / 32 | Sediment-GEM hori-<br>zontal resolution. |
|  | ROKGEMNLONS /<br>ROKGEMNLATS | 64 / 32 | Rock-GEM horizontal<br>resolution.       |

199

200 **Supplementary Figures**

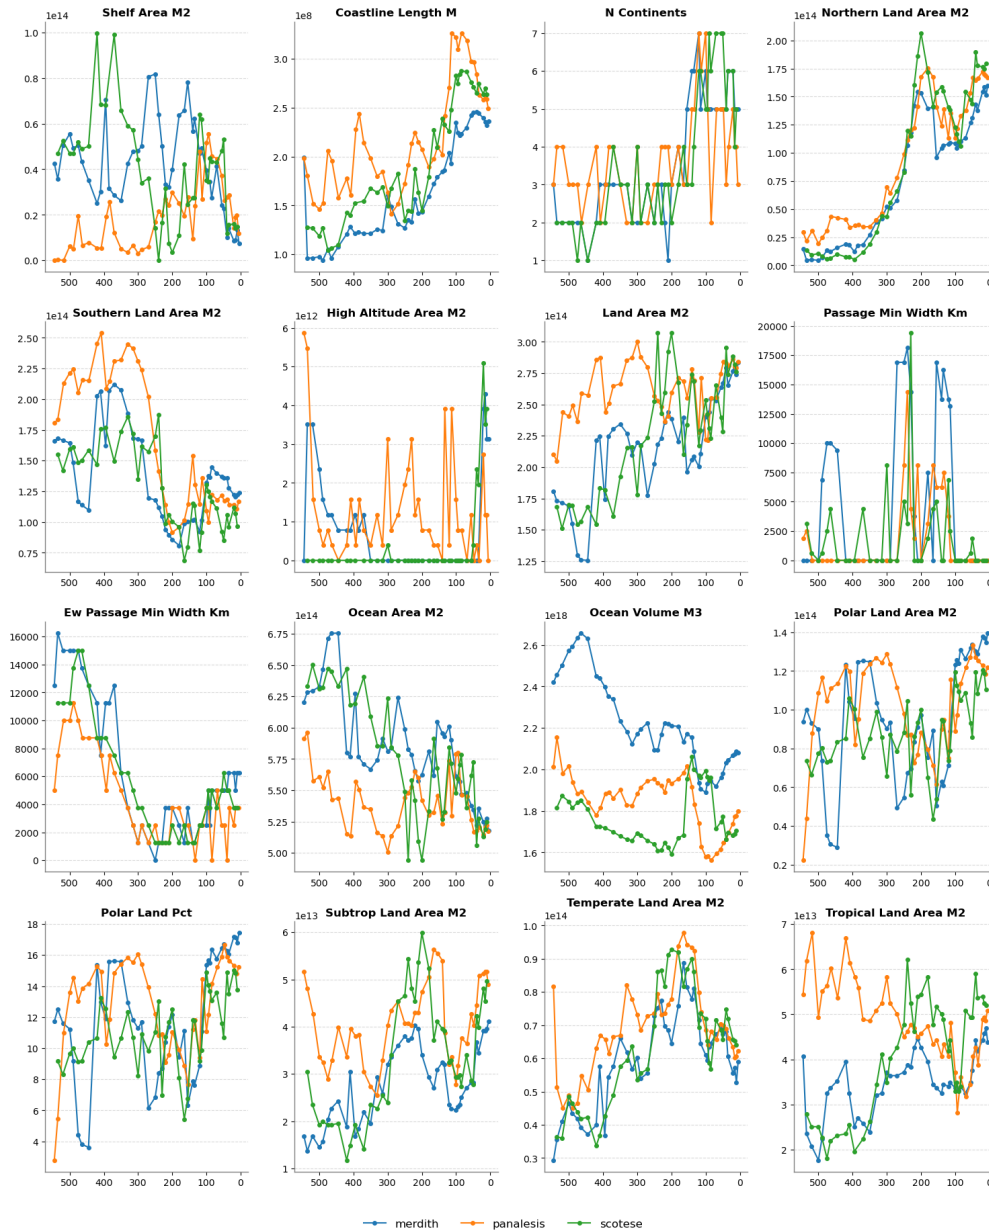

201

**Supplementary Fig. S1: Time evolution of geographic indicators across Phanerozoic paleogeographic reconstructions.** Sixteen indices describing global land–sea distribution and plate configuration are shown as a function of geological time (0–500 Ma), including shelf area, coastline length, number of continents, latitudinal land-area partitions (northern, southern, polar, subtropical, temperate, tropical), high-altitude area, total land and ocean area, ocean volume, and minimum widths of key passages (global and east–west). Each panel displays three reconstructions—MERDITH (blue), PANALESIS (orange), and SCOTESE (green)—computed with the `geo_indicators` framework ([https://github.com/florianfranz/geo\\_indicators](https://github.com/florianfranz/geo_indicators)), illustrating both common trends and reconstruction-dependent differences in large-scale geography relevant for climate modeling.

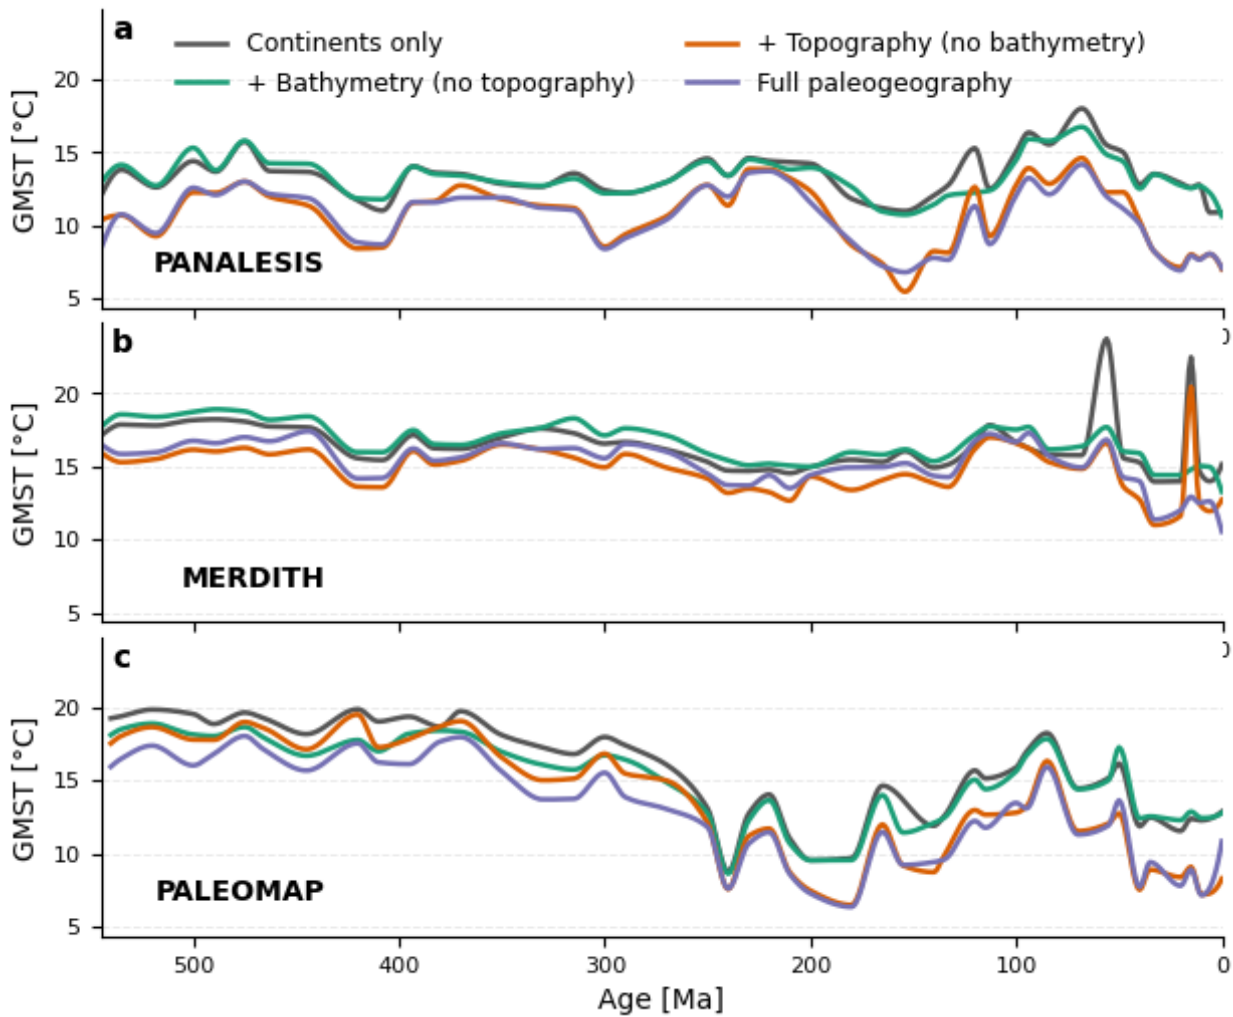

**Supplementary Fig. S2: Global mean surface temperature (GMST) evolution for each paleogeographic reconstruction and geographic complexity tier.** Panels show GMST versus age for (a) PANALESIS, (b) MERDITH, and (c) PALEOMAP reconstructions, with four experiment tiers per reconstruction: “continents only” (fixed 100 m land elevation and uniform 4000 m ocean depth), “+ bathymetry (no topography)” (reconstructed ocean bathymetry, flat continents), “+ topography (no bathymetry)” (reconstructed continental topography, uniform ocean depth), and “full paleogeography” (reconstructed land–sea mask, topography, and bathymetry). All simulations use the PlaSim–GENIE Earth system model forced with identical external boundary conditions (solar constant  $1365 \text{ W m}^{-2}$ , atmospheric  $\text{CO}_2 = 1120$  ppm, no interactive vegetation), isolating the influence of paleogeographic complexity on GMST.

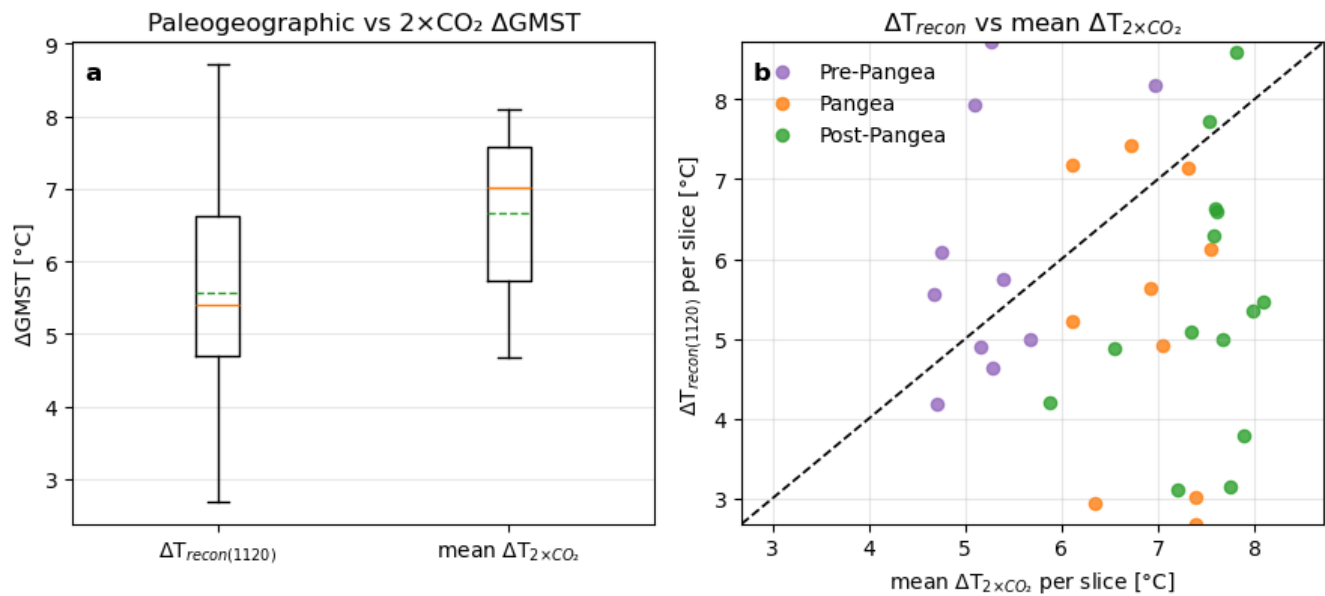

**Supplementary Figure S3. Global-mean surface temperature (GMST) variability from paleogeographic uncertainty compared to CO<sub>2</sub> doubling.** (a) Boxplots of slice-wise GMST differences for the strict subset of ages where all three reconstructions are available at both 1120 and 2240 ppm. The paleogeographic spread at fixed CO<sub>2</sub>,  $\Delta T_{recon(1120)}$  (max–min GMST across reconstructions), has a mean of 5.56 °C (median 5.41 °C, interquartile range 4.70–6.62 °C), while the corresponding mean CO<sub>2</sub>-doubling response, mean  $\Delta T_{2 \times CO_2}$  (GMST<sub>2240</sub>–GMST<sub>1120</sub> averaged across reconstructions), has a mean of 6.66 °C (median 7.01 °C, interquartile range 5.73–7.58 °C). (b) Strict per-slice comparison of  $\Delta T_{recon(1120)}$  versus mean  $\Delta T_{2 \times CO_2}$ , color-coded by tectonic regime (Pre-Pangea, Pangea, Post-Pangea); the dashed line marks equality. Across all time slices, the ratio  $R = \Delta T_{recon(1120)} / \text{mean } \Delta T_{2 \times CO_2}$  has a mean and median of 0.86 (IQR 0.68–1.05), and 29.4 % of slices exhibit  $\Delta T_{recon(1120)} > \text{mean } \Delta T_{2 \times CO_2}$ . Regime-wise, paleogeographic spread exceeds or matches the CO<sub>2</sub>-doubling response in most Pre-Pangea slices ( $\Delta T_{recon}$  mean = 6.09 °C vs. mean  $\Delta T_{2 \times CO_2}$  = 5.30 °C; 60 % of slices with  $\Delta T_{recon} > \text{mean } \Delta T_{2 \times CO_2}$ ), while during Pangea (5.22 vs. 6.89 °C; 20 %) and Post-Pangea (5.42 vs. 7.46 °C; 14.3 %) the CO<sub>2</sub>-doubling signal tends to dominate but remains of the same order as the paleogeographic uncertainty. Together, this demonstrate that inter-reconstruction paleogeographic differences routinely generate GMST variations comparable in magnitude to those produced by a doubling of atmospheric CO<sub>2</sub>.

205

206

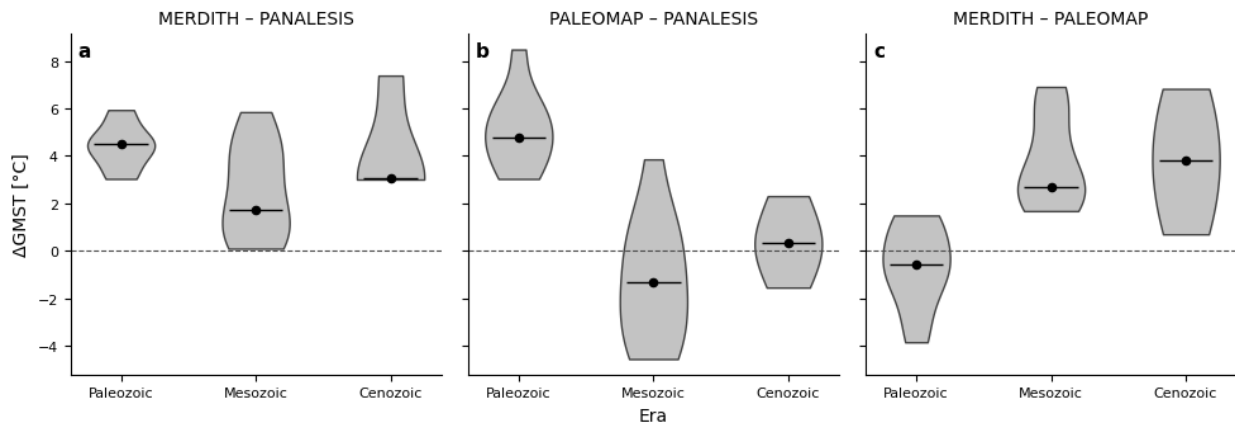

207 **Supplementary Fig. S4: GMST spread diagnostics: pairwise reconstruction differences.** Violin plots show the  
 208 distribution of pairwise differences in global mean surface temperature ( $\Delta\text{GMST}$ ) between paleogeographic recon-  
 209 structions, computed as across-tier means for each time slice and grouped by era (Paleozoic, Mesozoic, Cenozoic).  
 Panels depict (a) MERDITH – PANALEISIS, (b) PALEOMAP – PANALEISIS, and (c) MERDITH – PALEOMAP.  
 Positive values indicate that the reconstruction listed first is warmer than the second. The era-stratified distributions  
 highlight that MERDITH is systematically warmer and PANALEISIS systematically cooler, with PALEOMAP  
 generally intermediate, and demonstrate that the  $\sim 5$  °C mean spread and occasional  $>8$  °C extremes reported in the  
 main text arise from a broad range of time slices rather than a single outlier interval.

210

211

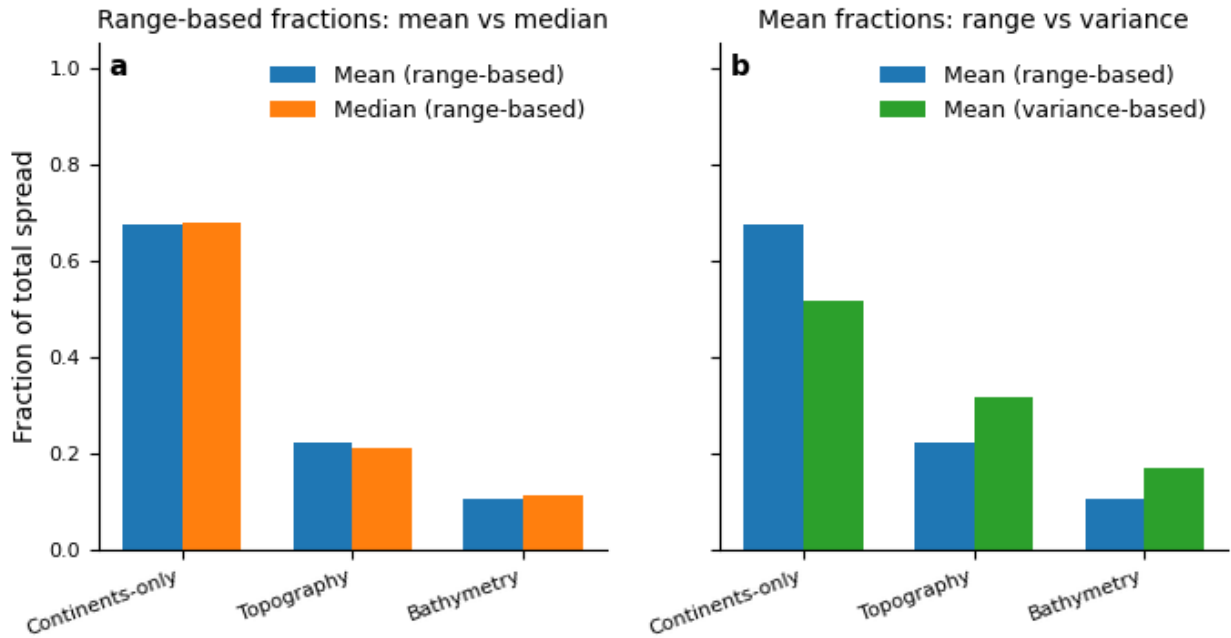

**Supplementary Fig. S5: Sensitivity of the paleogeographic spread decomposition to analysis choices.**

**(a)** Comparison of mean (dark blue) and median (orange) fractional contributions of continental configuration (“Continents-only”), surface topography (“Topography”), and ocean bathymetry (“Bathymetry”) to the total inter-reconstruction GMST spread, using the range across reconstructions as the spread metric and the same hierarchical decomposition as in Fig. 3b. Bars show the fraction of the total decomposed spread attributable to each component, averaged (or median-aggregated) over all matched Phanerozoic time slices. **(b)** Comparison of the mean range-based fractions (dark blue; as in panel a) with mean fractions obtained from an ANOVA-style variance decomposition (green), in which component contributions are defined from changes in the variance across reconstructions between successive tiers of geographic complexity. Across all analysis choices (mean vs median, range- vs variance-based), continental configuration consistently accounts for the majority of reconstruction-induced GMST spread, with topography providing a secondary contribution and bathymetry remaining comparatively minor, demonstrating that the dominance of continents is robust to the choice of diagnostic.

212

213

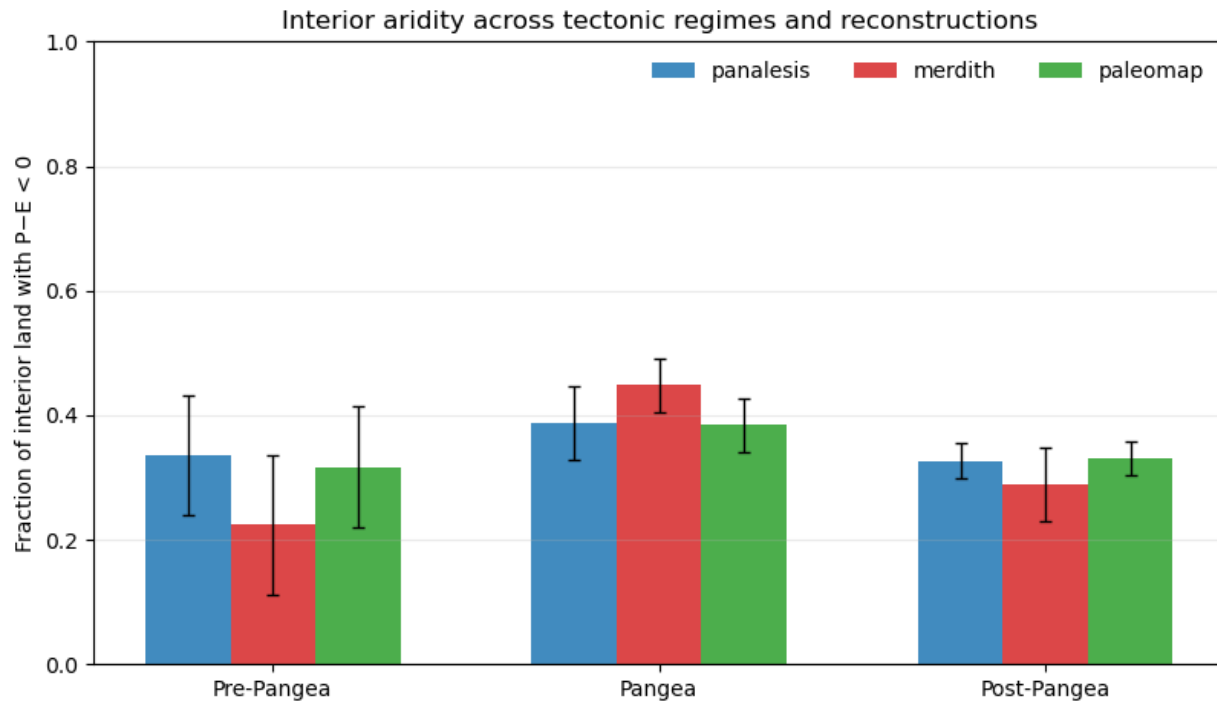

**Supplementary Fig. S6: Interior aridity across tectonic regimes and paleogeographic reconstructions.** Bars show the mean fraction of interior land area with negative moisture balance  $P - E < 0$ ) for pre-Pangea (545–320 Ma), Pangea (320–200 Ma), and post-Pangea (200–0 Ma) configurations, computed separately for the PANALEISIS (blue), MERDITH (red), and PALEOMAP (green) reconstruction families. Error bars indicate the variability across time slices within each tectonic regime.

214

215

216

217

218

219

220

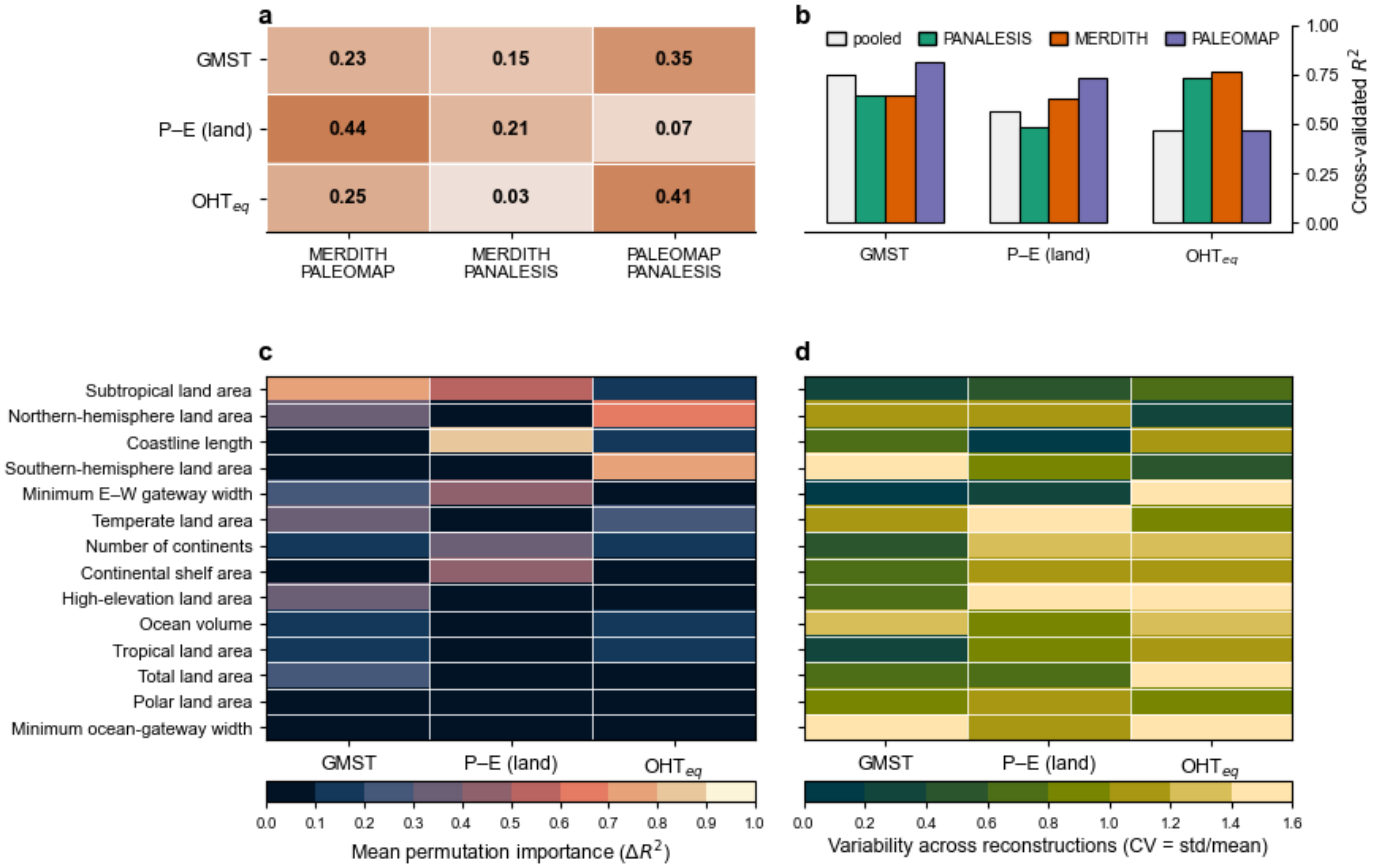

**Supplementary Fig. S7. Statistical attribution of inter-reconstruction climate differences to large-scale geographic indicators.** (a) Cross-validated  $R^2$  values for linear models trained on one paleogeographic reconstruction and evaluated on another, for three climate diagnostics: GMST, continental moisture balance (land-mean P - E), and OHT<sub>eq</sub>. Each cell summarizes model transferability between reconstruction pairs (MERDITH—PALEOMAP, MERDITH—PANALEISIS, PALEOMAP—PANALEISIS), with values ranging from  $\sim 0.07$  to  $\sim 0.44$ , indicating that simple geographic predictors capture only part of the reconstruction-to-reconstruction spread and that the functional relationships between geography and climate are not fully interchangeable across reconstructions. (b) Cross-validated  $R^2$  for models fit separately to each reconstruction (PANALEISIS, MERDITH, PALEOMAP) and to the pooled multi-reconstruction dataset, for GMST, land-mean P - E, and OHT<sub>eq</sub>. The pooled model performs comparably to, or slightly better than, most single-reconstruction fits for GMST up to  $R^2 \approx 0.75$ , reflecting robust large-scale controls of temperature by geography, whereas skill is lower and more reconstruction-dependent for hydrological and ocean-circulation metrics, especially land-mean P - E. (c) Mean permutation importance (change in  $R^2$ ,  $\Delta R^2$ ) for individual geographic indicators when predicting GMST, land-mean P - E, and OHT<sub>eq</sub>. Higher values indicate predictors whose random permutation most strongly degrades model skill. Subtropical land area, northern-hemisphere land area, and coastline length emerge among the most influential controls across variables, consistent with their roles in setting meridional temperature gradients, continental interiors, and land-sea thermal contrasts. Other indicators, such as the number of continents, minimum east-west gateway width, and high-elevation land area, show more moderate importance, suggesting geographically mediated but secondary impacts on the simulated climate diagnostics. (d) Coefficient of variation ( $CV = \text{standard deviation}/\text{mean}$ ) of the same indicators across the three reconstructions, again shown separately for GMST, land-mean P - E, and OHT<sub>eq</sub>. High CV values highlight geographic features that differ most strongly among PANALEISIS, MERDITH, and PALEOMAP (e.g., temperate and subtropical land areas, minimum gateway widths), and thus contribute disproportionately to inter-reconstruction climate spread, whereas low-CV indicators (e.g., total land area, ocean volume) are comparatively stable and less responsible for the modeled divergence. Taken together, these panels show that a small set of large-scale geographic metrics both strongly influences climate and varies substantially among reconstructions, providing a compact explanation for why paleogeographic uncertainty alone produces multi-degree differences in Phanerozoic climate simulations.

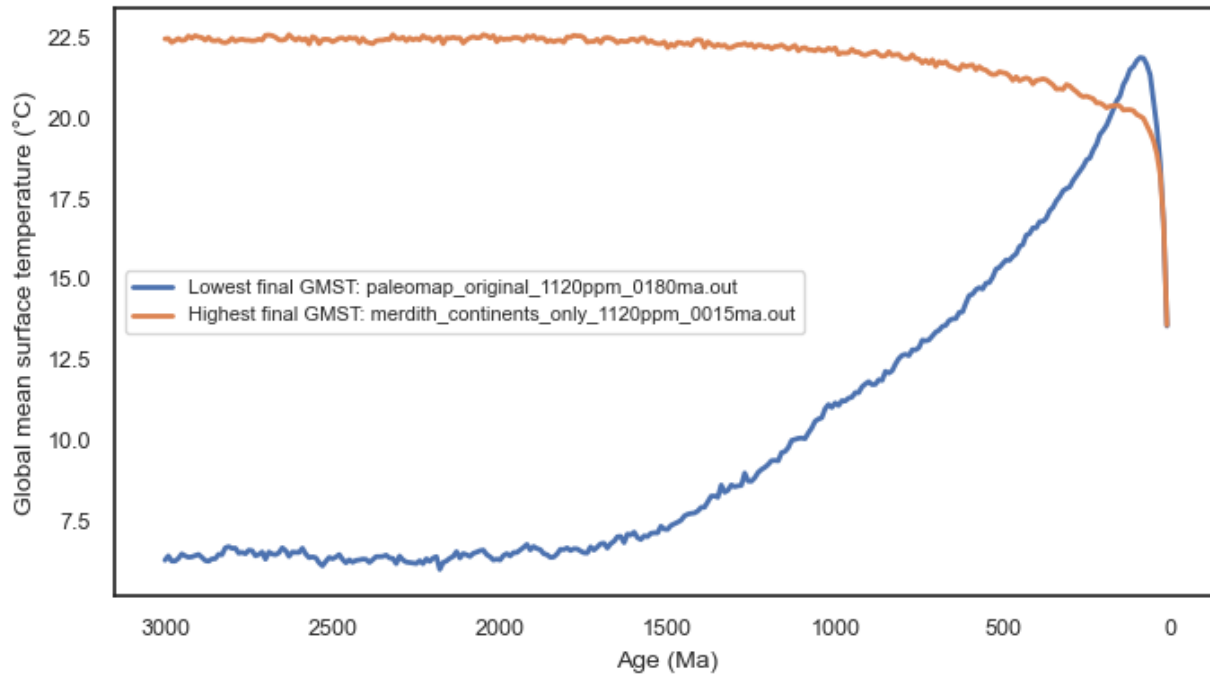

**Supplementary Fig. S8: Model spinup for highest and lowest final GMST value.** Independent of final temperature value, all simulations reach a quasi-equilibrium state at 3000 years.

222

223 **Supplementary References**

224 Franziskakis, F., Vérard, C., Castellort, S., & Giuliani, G. (2025). Comparing 545 Million Years  
 225 of Sea-Level Change: New Insights from the TopoChronia QGIS Plugin. *The International Ar-*  
 226 *chives of the Photogrammetry, Remote Sensing and Spatial Information Sciences*, 48, 111-118.

227 Merdith, A. *et al.* Where were the mountains and how big were they? [https://eartharxiv.org/re-](https://eartharxiv.org/repository/object/10989/download/20094/)  
 228 [pository/object/10989/download/20094/](https://eartharxiv.org/repository/object/10989/download/20094/) (2025).

229 Scotese, C. R. (2021). An atlas of Phanerozoic paleogeographic maps: the seas come in and the  
 230 seas go out. *Annual Review of Earth and Planetary Sciences*, 49(1), 679-728.

231

232

233
